# Supplementary material for: Mesolimbic dopamine adapts the rate of learning from action
Source: PubMed Central journal article supplement (PMC9908546; doi:10.1038/s41586-022-05614-z), 2023-01-18
Supplement: 41586_2022_5614_MOESM1_ESM.pdf [file 41586_2022_5614_MOESM1_ESM.pdf]

**Supplementary information**

---

**Mesolimbic dopamine adapts the rate of learning from action**

---

In the format provided by the authors and unedited

|       | trace conditioning group |           |           |               | cued VTA-DA stimulation |             |
|-------|--------------------------|-----------|-----------|---------------|-------------------------|-------------|
|       | (Fig. 1, 2, 4, 5)        |           |           | (Ext. Fig. 4) | (Fig. 3)                |             |
| mouse | control                  | stimLick+ | stimLick- | stim. at cue  | reg. stim.              | large stim. |
| 1     | x                        |           |           |               | x                       |             |
| 2     | x                        |           |           |               |                         |             |
| 3     |                          |           | x         |               |                         | x           |
| 4     | x                        |           |           |               |                         | x           |
| 5     |                          |           | x         |               | x                       |             |
| 6     | x                        |           |           |               |                         | x           |
| 7     |                          | x         |           |               |                         | x           |
| 8     |                          | x         |           |               | x                       |             |
| 9     | x                        |           |           |               | x                       |             |
| 10    |                          |           | x         |               | x                       |             |
| 11    | x                        |           |           |               |                         | x           |
| 12    |                          | x         |           |               | x                       |             |
| 13    |                          | x         |           | x             |                         | x           |
| 14    |                          |           | x         |               |                         | x           |
| 15    | x                        |           |           | x             | x                       |             |
| 16    | x                        |           |           | x             | x                       |             |
| 17    |                          | x         |           | x             | x                       |             |
| 18    |                          |           | x         |               | x                       |             |
| 19    | x                        |           |           |               |                         |             |
| 20    |                          |           | x         | x             | x                       |             |

**Supplementary Table 1.** Successive experimental group membership for each mouse. Mice #21-24 are not included above as they were only used for a single experiment, the stim+Lick+ experiments in Fig. 5g-i
